# Supplementary material for: Peripheral blood cellular dynamics during the progression of human tuberculosis
Source: Research Square preprint supplement (doi:10.21203/rs.3.rs-5576143/v1), 2024-12-12
Supplement: Supplementary file 1 [file 0086fc4f604563bf62d989e5.xlsx]

## Sheet: Supplementary Table S9A
Supplementary Table S9. Results of longitudinal multi-cohort meta-analyses of TB progressors across global cohorts, stratified by time intervals before TB diagnosis: (A) (inf, -540), (B) [-540, -360), (C) [-360, -180), (D) [-180, -60), (E) [-60, -21), and (F) [-21, 0].
Cell type	Effect Size	StandardError(Effect Size)	FDR	Number of studies
Monocytes	0.530209	0.493858	0.0179299	2
Neutrophils	0.0930806	0.217292	0.8694	2
CD4+ T cells	-0.155657	0.2174	0.68437	2
CD8+ T cells	-0.37301	0.217547	0.439155	2
NK cells	-0.0890878	0.217362	0.68437	2
B cells	-0.373221	0.217565	0.439155	2

## Sheet: Supplementary Table S9B
Supplementary Table S9. Results of longitudinal multi-cohort meta-analyses of TB progressors across global cohorts, stratified by time intervals before TB diagnosis: (A) (inf, -540), (B) [-540, -360), (C) [-360, -180), (D) [-180, -60), (E) [-60, -21), and (F) [-21, 0].
Cell type	Effect Size	StandardError(Effect Size)	FDR	Number of studies
Monocytes	0.649114	0.172853	0.00236816	2
Neutrophils	0.0828291	0.171851	0.935919	2
CD4+ T cells	-0.287362	0.172044	0.444511	2
CD8+ T cells	-0.135622	0.171879	0.722942	2
NK cells	-0.0703625	0.171865	0.722942	2
B cells	-0.346682	0.172161	0.423104	2

## Sheet: Supplementary Table S9C
Supplementary Table S9. Results of longitudinal multi-cohort meta-analyses of TB progressors across global cohorts, stratified by time intervals before TB diagnosis: (A) (inf, -540), (B) [-540, -360), (C) [-360, -180), (D) [-180, -60), (E) [-60, -21), and (F) [-21, 0].
Cell type	Effect Size	StandardError(Effect Size)	FDR	Number of studies
Monocytes	1.0656	0.329784	2.92157e-09	3
Neutrophils	-0.137761	0.214737	0.341231	3
CD4+ T cells	-0.30515	0.182313	0.0959478	3
CD8+ T cells	0.0674771	0.148265	0.766154	3
NK cells	-0.281815	0.246102	0.0639408	3
B cells	-0.241872	0.148488	0.280567	3

## Sheet: Supplementary Table S9D
Supplementary Table S9. Results of longitudinal multi-cohort meta-analyses of TB progressors across global cohorts, stratified by time intervals before TB diagnosis: (A) (inf, -540), (B) [-540, -360), (C) [-360, -180), (D) [-180, -60), (E) [-60, -21), and (F) [-21, 0].
Cell type	Effect Size	StandardError(Effect Size)	FDR	Number of studies
Monocytes	0.703361	0.323877	0.000390786	2
Neutrophils	0.0600338	0.476828	0.0579295	2
CD4+ T cells	-0.249659	0.146598	0.25866	2
CD8+ T cells	-0.13745	0.298937	0.25866	2
NK cells	-0.249702	0.146546	0.25866	2
B cells	-0.462988	0.147232	0.0219967	2

## Sheet: Supplementary Table S9E
Supplementary Table S9. Results of longitudinal multi-cohort meta-analyses of TB progressors across global cohorts, stratified by time intervals before TB diagnosis: (A) (inf, -540), (B) [-540, -360), (C) [-360, -180), (D) [-180, -60), (E) [-60, -21), and (F) [-21, 0].
Cell type	Effect Size	StandardError(Effect Size)	FDR	Number of studies
Monocytes	1.24495	0.301841	0.000393749	2
Neutrophils	-0.142885	0.317125	0.567702	2
CD4+ T cells	-0.566517	0.415994	0.270379	2
CD8+ T cells	-0.0564745	0.396776	0.567702	2
NK cells	0.0745303	0.521642	0.567702	2
B cells	-0.370014	0.291399	0.38073	2

## Sheet: Supplementary Table S9F
Supplementary Table S9. Results of longitudinal multi-cohort meta-analyses of TB progressors across global cohorts, stratified by time intervals before TB diagnosis: (A) (inf, -540), (B) [-540, -360), (C) [-360, -180), (D) [-180, -60), (E) [-60, -21), and (F) [-21, 0].
Cell type	Effect Size	StandardError(Effect Size)	FDR	Number of studies
Monocytes	1.22179	0.196726	4.60739e-09	2
Neutrophils	0.0795397	0.181616	0.913449	2
CD4+ T cells	-0.314503	0.250776	0.138778	2
CD8+ T cells	0.138491	0.181732	0.776479	2
NK cells	-0.978213	0.191428	4.03286e-06	2
B cells	-0.819887	0.188528	6.67762e-05	2
