# Supplementary material for: Peripheral blood cellular dynamics during the progression of human tuberculosis
Source: Research Square preprint supplement (doi:10.21203/rs.3.rs-5576143/v1), 2024-12-12
Supplement: Supplementary file 2 [file 3164c95500cc34b537e35c99.xlsx]

## Sheet: Supplementary Table S6A
Supplementary Table S6. Summary of cross-sectional cohorts used in multi-cohort meta-analyses for comparisons between (A) UI and LTBI NP, (B) UI and ITB, (C) UI and STB, (D) LTBI NP and ITB, (E) ITB and STB, and (F) STB and ATB.
Dataset	Tissue	Country	Samples	Uninfected (UI)	LTBI Non-Progressor (LTBI NP)	TB burden	Age group	HIV status
E-MTAB-6845	Whole Blood	the United Kingdom	351	217	134	Low	Adult / Senior	Negative
GSE41055	Whole Blood	Venezuela	18	9	9	High	Adolescent	Negative
GSE84076	Whole Blood	Brazil	28	12	16	High	Adult	Unknown
GSE107993	Whole Blood	the United Kingdom	138	69	69	Low	Adult	Negative
GSE107994	Whole Blood	the United Kingdom	99	50	49	Low	Adult	Negative
GSE116014	Whole Blood	South Africa	82	24	58	High	Adolescent	Negative
Total			716	381	335

## Sheet: Supplementary Table S6B
Supplementary Table S6. Summary of cross-sectional cohorts used in multi-cohort meta-analyses for comparisons between (A) UI and LTBI NP, (B) UI and ITB, (C) UI and STB, (D) LTBI NP and ITB, (E) ITB and STB, and (F) STB and ATB.
Dataset	Tissue	Country	Samples	Uninfected (UI)	Incipient TB (ITB)	TB burden	Age group	HIV status
GSE107994	Whole Blood	the United Kingdom	52	50	2*	Low	Adult	Negative
GSE157657	Whole Blood	the United Kingdom	48	38	10	Low	Adult	Negative
Total			48	38	10
*Samples < 5 were not selected

## Sheet: Supplementary Table S6C
Supplementary Table S6. Summary of cross-sectional cohorts used in multi-cohort meta-analyses for comparisons between (A) UI and LTBI NP, (B) UI and ITB, (C) UI and STB, (D) LTBI NP and ITB, (E) ITB and STB, and (F) STB and ATB.
Dataset	Tissue	Country	Samples	Uninfected (UI)	Subclinical TB (STB)	TB burden	Age group	HIV status
GSE107994	Whole Blood	the United Kingdom	62	50	12	Low	Adult	Negative
GSE157657	Whole Blood	the United Kingdom	48	38	10	Low	Adult	Negative
Total			110	88	22

## Sheet: Supplementary Table S6D
Supplementary Table S6. Summary of cross-sectional cohorts used in multi-cohort meta-analyses for comparisons between (A) UI and LTBI NP, (B) UI and ITB, (C) UI and STB, (D) LTBI NP and ITB, (E) ITB and STB, and (F) STB and ATB.
Dataset	Tissue	Country	Samples	LTB Non-Progressor (LTBI NP)	Incipient TB (ITB)	TB burden	Age group	HIV status
GSE107994	Whole Blood	the United Kingdom	51	49	2*	Low	Adult	Negative
GSE193777	Whole Blood	India	84	74	10	High	Adolescent / Adult	Negative
Total			84	74	10
*Samples < 5 were not selected

## Sheet: Supplementary Table S6E
Supplementary Table S6. Summary of cross-sectional cohorts used in multi-cohort meta-analyses for comparisons between (A) UI and LTBI NP, (B) UI and ITB, (C) UI and STB, (D) LTBI NP and ITB, (E) ITB and STB, and (F) STB and ATB.
Dataset	Tissue	Country	Samples	Incipient TB (ITB)	Subclinical TB (STB)	TB burden	Age group	HIV status
GSE107994	Whole Blood	the United Kingdom	14	2*	12	Low	Adult	Negative
GSE157657	Whole Blood	the United Kingdom	20	10	10	Low	Adult	Negative
GSE193777	Whole Blood	India	58	10	48	High	Adolescent / Adult	Negative
Total			78	20	58
*Samples < 5 were not selected

## Sheet: Supplementary Table S6F
Supplementary Table S6. Summary of cross-sectional cohorts used in multi-cohort meta-analyses for comparisons between (A) UI and LTBI NP, (B) UI and ITB, (C) UI and STB, (D) LTBI NP and ITB, (E) ITB and STB, and (F) STB and ATB.
Dataset	Tissue	Country	Samples	Subclinical TB (STB)	Active TB (ATB)	TB burden	Age group	HIV status
GSE69581	Whole Blood	South Africa	25	10	15	Low	Adult	Negative
GSE107994	Whole Blood	the United Kingdom	74	12	62	High	Adult	Negative
GSE157657	Whole Blood	the United Kingdom	77	10	67	High	Adult	Negative
GSE193777	Whole Blood	India	59	48	11	Low	Adult	Negative
Total			235	80	155
