# Supplementary material for: Peripheral blood cellular dynamics during the progression of human tuberculosis
Source: Research Square preprint supplement (doi:10.21203/rs.3.rs-5576143/v1), 2024-12-12
Supplement: Supplementary file 4 [file 5704d9feb1684a30561191be.xlsx]

## Sheet: Supplementary Table S7A
Supplementary Table S7. Results of cross-sectional multi-cohort meta-analyses for comparisons between (A) UI and LTBI NP, (B) UI and ITB, (C) UI and STB, (D) LTBI NP and ITB, (E) ITB and STB, and (F) STB and ATB across global cohorts.
Cell type	Effect Size	StandardError(Effect Size)	FDR	Number of studies
Monocytes	0.163166	0.0768391	0.301117	6
Neutrophils	-0.133988	0.0767707	0.51279	6
CD4+ T cells	0.00536414	0.110757	0.51279	6
CD8+ T cells	0.0577657	0.076699	0.716076	6
NK cells	-0.0727027	0.116114	0.51279	6
B cells	0.0854469	0.125333	0.301117	6

## Sheet: Supplementary Table S7B
Supplementary Table S7. Results of cross-sectional multi-cohort meta-analyses for comparisons between (A) UI and LTBI NP, (B) UI and ITB, (C) UI and STB, (D) LTBI NP and ITB, (E) ITB and STB, and (F) STB and ATB across global cohorts.
Cell type	Effect Size	StandardError(Effect Size)	FDR	Number of studies
Monocytes	0.771239	0.364782	0.105317	1
Neutrophils	-0.345925	0.357315	0.425851	1
CD4+ T cells	0.619054	0.361476	0.180297	1
CD8+ T cells	-0.578352	0.36071	0.340775	1
NK cells	-1.24854	0.379481	0.0054939	1
B cells	-0.0678774	0.355483	0.786407	1

## Sheet: Supplementary Table S7C
Supplementary Table S7. Results of cross-sectional multi-cohort meta-analyses for comparisons between (A) UI and LTBI NP, (B) UI and ITB, (C) UI and STB, (D) LTBI NP and ITB, (E) ITB and STB, and (F) STB and ATB across global cohorts.
Cell type	Effect Size	StandardError(Effect Size)	FDR	Number of studies
Monocytes	1.12093	0.251281	7.43658e-05	2
Neutrophils	0.333472	0.239548	0.761329	2
CD4+ T cells	-0.0956538	0.28401	0.552117	2
CD8+ T cells	-0.368199	0.240377	0.21641	2
NK cells	-0.605005	0.242472	0.0562382	2
B cells	-0.839066	0.245987	0.00524608	2

## Sheet: Supplementary Table S7D
Supplementary Table S7. Results of cross-sectional multi-cohort meta-analyses for comparisons between (A) UI and LTBI NP, (B) UI and ITB, (C) UI and STB, (D) LTBI NP and ITB, (E) ITB and STB, and (F) STB and ATB across global cohorts.
Cell type	Effect Size	StandardError(Effect Size)	FDR	Number of studies
Monocytes	0.123812	0.33706	0.761281	1
Neutrophils	-0.0233186	0.336923	0.694369	1
CD4+ T cells	-0.432615	0.338648	0.694369	1
CD8+ T cells	0.656917	0.340894	0.341034	1
NK cells	0.0286824	0.336925	0.694369	1
B cells	-0.112824	0.337036	0.694369	1

## Sheet: Supplementary Table S7E
Supplementary Table S7. Results of cross-sectional multi-cohort meta-analyses for comparisons between (A) UI and LTBI NP, (B) UI and ITB, (C) UI and STB, (D) LTBI NP and ITB, (E) ITB and STB, and (F) STB and ATB across global cohorts.
Cell type	Effect Size	StandardError(Effect Size)	FDR	Number of studies
Monocytes	0.129078	0.27467	0.866806	2
Neutrophils	0.32946	0.27768	0.866806	2
CD4+ T cells	-0.0249569	0.275326	0.853801	2
CD8+ T cells	-0.368005	0.276393	0.751802	2
NK cells	0.118895	0.276168	0.866806	2
B cells	-0.174305	0.280669	0.751802	2

## Sheet: Supplementary Table S7F
Supplementary Table S7. Results of cross-sectional multi-cohort meta-analyses for comparisons between (A) UI and LTBI NP, (B) UI and ITB, (C) UI and STB, (D) LTBI NP and ITB, (E) ITB and STB, and (F) STB and ATB across global cohorts.
Cell type	Effect Size	StandardError(Effect Size)	FDR	Number of studies
Monocytes	0.663683	0.242861	0.000647479	4
Neutrophils	0.507618	0.349179	0.0012754	4
CD4+ T cells	-0.692063	0.176028	0.00167181	4
CD8+ T cells	-0.381152	0.219672	0.0329061	4
NK cells	-0.415486	0.219841	0.0286249	4
B cells	-0.381973	0.26051	0.0286249	4
