# Supplementary material for: Peripheral blood cellular dynamics during the progression of human tuberculosis
Source: Research Square preprint supplement (doi:10.21203/rs.3.rs-5576143/v1), 2024-12-12
Supplement: Supplementary file 5 [file 5bc1b1259c39b515bb141ac0.xlsx]

## Sheet: Supplementary Table S10A
Supplementary Table S10. Summary of longitudinal cohorts used in multi-cohort meta-analyses of blood samples from treated ATB patients, categorized by days after anti-TB treatment (A) without treatment outcomes or (B) with treatment outcomes.
Dataset	Tissue	Country	Samples	Active Tuberculosis (ATB)	Days after anti-TB Treatment				TB burden	Age group	HIV status
					[7, 28]	(28, 60]	(60, 182]	(182, 360]
GSE19435	Whole Blood	the United Kingdom	21	7	NA	7	NA	7	Low	Adult	Negative
GSE31348	Whole Blood	South Africa	135	27	81	NA	27	NA	High	Adult	Negative
GSE36238	Whole Blood	South Africa	18	9	NA	NA	9	NA	High	Adult	Negative
GSE40553	Whole Blood	the United Kingdom / South Africa	166	37	32	29	39	29	High / Low	Adult	Negative
GSE54992	PBMC	China	27	9	NA	NA	18	NA	High	Adult	Unknown
GSE56153	Whole Blood	Indonesia	53	18	NA	15	NA	20	High	Unknown	Negative
GSE62147	Whole Blood	The Gambia	28	14	NA	NA	14	NA	High	Unknown	Negative
GSE67589	Whole Blood	South Africa	57	19	38	NA	NA	NA	High	Adult	Negative
GSE158208	Whole Blood	South Africa	12	6	NA	NA	6	NA	High	Adult	Positive
Total			496	139	151	44	113	49

## Sheet: Supplementary Table S10B
Supplementary Table S10. Summary of longitudinal cohorts used in multi-cohort meta-analyses of blood samples from treated ATB patients, categorized by days after anti-TB treatment (A) without treatment outcomes or (B) with treatment outcomes.
Dataset	Cohort Name	Tissue	Country	Treatment results	Samples	Active Tuberculosis (ATB)	Days after anti-TB Treatment								TB burden	Age group	HIV status
							(0, 7]	(14, 30]	(7, 60]	(60, 120]	(120, 180]	(180, 240]	(240, 360]	(360, Inf)
GSE157657	Tabone_Leicester	Whole Blood	the United Kingdom	standard ATT	118	14	11	NA	41	12	14	5	6	15	Low	Adolescent / Adult / Senior	Negative
				extended ATT	350	27	27	NA	115	32	38	31	35	45		Adolescent / Adult / Senior
				difficult TB cases	47	5	4	NA	17	4	2	2	3	10		Adult / Senior
				TB drug-resistant	37	3	1*	NA	10	2	2	3	5	12		Adult / Senior
				outbreak TB strain	81	2	5	NA	26	7	8	6	11	16		Adult / Senior
GSE89403	Thompson_SA	Whole Blood	South Africa	cured	568	142	140	140	NA	NA	146	NA	NA	NA	High	Adult	Negative
				not cured	110	24	30	28	NA	NA	28	NA	NA	NA
				probable cured	56	14	12	16	NA	NA	14	NA	NA	NA
Total					1367	231	229	184	209	57	252	47	60	98
*Groups with less than 2 samples were not used in comparison.
ATT: anti-TB treatment
