# Supplementary material for: Peripheral blood cellular dynamics during the progression of human tuberculosis
Source: Research Square preprint supplement (doi:10.21203/rs.3.rs-5576143/v1), 2024-12-12
Supplement: Supplementary file 6 [file 681812922a0db9772285fa32.xlsx]

## Sheet: Supplementary Table S1
GSE
Supplementary Table S1. A compilation of 43 blood transcriptomic datasets of human TB disease obtained from GEO and ArrayExpress.
Accession number	Study type	Tissue	Technology		Country	TB burden	Age	Age group	HIV status	Samples	Uninfected		Latent Tuberculosis Infection				Active Tuberculosis	Anti-TB Treatment	Time periods before TB diagnosis						Publication Title	Publication Year	Publication Link
			Microarray	RNA-seq							Healthy	Uninfected	LTBI Unclassified	LTB Non-Progressor	Incipient TB	Subclinical TB	Clinical TB		(-Inf, -540]	(-540, -360]	(-360, -180]	(-180, -60]	(-60, -21]	(-60, -21]
E-MTAB-6845	Cross-sectional / Longitudinal	Whole Blood		Illumina NextSeq 500	the United Kingdom	Low	16 - 84	Adolescent / Adult / Senior	Negative	360	NA	217	NA	134	NA	NA	NA	NA	1	NA	5	2	NA	1	Blood Transcriptomic Stratification of Short-term Risk in Contacts of Tuberculosis	2019	https://academic.oup.com/cid/article/70/5/731/5421263?login=true
GSE19435	Cross-sectional / Longitudinal	Whole Blood	Illumina		the United Kingdom	Low	21 - 51	Adult	Negative	33	12	NA	NA	NA	NA	NA	7	14	NA	NA	NA	NA	NA	NA	An interferon-inducible neutrophil-driven blood transcriptional signature in human tuberculosis	2010	https://www.ncbi.nlm.nih.gov/pmc/articles/PMC3492754/
GSE19439	Cross-sectional	Whole Blood	Illumina		the United Kingdom	Low	19 - 72	Adult / Senior	Negative	42	12	NA	17	NA	NA	NA	13	NA	NA	NA	NA	NA	NA	NA	An interferon-inducible neutrophil-driven blood transcriptional signature in human tuberculosis	2010	https://www.ncbi.nlm.nih.gov/pmc/articles/PMC3492754/
GSE19442	Cross-sectional	Whole Blood	Illumina		South Africa	High	18 - 48	Adolescent / Adult	Negative	51	NA	NA	31	NA	NA	NA	20	NA	NA	NA	NA	NA	NA	NA	An interferon-inducible neutrophil-driven blood transcriptional signature in human tuberculosis	2010	https://www.ncbi.nlm.nih.gov/pmc/articles/PMC3492754/
GSE19444	Cross-sectional	Whole Blood	Illumina		the United Kingdom	Low	18 - 78	Adolescent / Adult / Senior	Negative	54	12	NA	21	NA	NA	NA	21	NA	NA	NA	NA	NA	NA	NA	An interferon-inducible neutrophil-driven blood transcriptional signature in human tuberculosis	2010	https://www.ncbi.nlm.nih.gov/pmc/articles/PMC3492754/
GSE28623	Cross-sectional	Whole Blood	Agilent		The Gambia	High	25 - 56	Adult	Negative	108	NA	37	25	NA	NA	NA	46	NA	NA	NA	NA	NA	NA	NA	Dysregulation of Apoptosis Is a Risk Factor for Tuberculosis Disease Progression	2015	https://doi.org/10.1093/infdis/jiv238
GSE31348	Longitudinal	Whole Blood	Affymetrix		South Africa	High	18-65	Adult	Negative	135	NA	NA	NA	NA	NA	NA	27	108	NA	NA	NA	NA	NA	NA	Distinct Phases of Blood Gene Expression Pattern Through Tuberculosis Treatment Reflect Modulation of the Humoral Immune Response	2013	https://doi.org/10.1093/infdis/jis499
GSE34608	Cross-sectional	Whole Blood	Agilent		Germany	Low	Unknown	Unknown	Unknown	26	18	NA	NA	NA	NA	NA	8	NA	NA	NA	NA	NA	NA	NA	Common patterns and disease-related signatures in tuberculosis and sarcoidosis	2012	https://www.ncbi.nlm.nih.gov/pmc/articles/PMC3356621/
GSE36238	Longitudinal	Whole Blood	Affymetrix		South Africa	High	18 - 65	Adult	Negative	18	NA	NA	NA	NA	NA	NA	9	9	NA	NA	NA	NA	NA	NA	Distinct Phases of Blood Gene Expression Pattern Through Tuberculosis Treatment Reflect Modulation of the Humoral Immune Response	2013	https://doi.org/10.1093/infdis/jis499
GSE37250	Cross-sectional	Whole Blood	Illumina		South Africa / Malawi	High	Unknown	Adult	Negative / Positive	362	NA	NA	167	NA	NA	NA	195	NA	NA	NA	NA	NA	NA	NA	Detection of Tuberculosis in HIV-Infected and -Uninfected African Adults Using Whole Blood RNA Expression Signatures: A Case-Control Study	2013	https://doi.org/10.1371/journal.pmed.1001538
GSE39939	Cross-sectional	Whole Blood	Illumina		Kenya	High	Unknown	Adolescent	Negative / Positive	93	NA	NA	14	NA	NA	NA	79	NA	NA	NA	NA	NA	NA	NA	Diagnosis of childhood tuberculosis and host RNA expression in Africa	2014	https://www.ncbi.nlm.nih.gov/pmc/articles/PMC4069985/
GSE39940	Cross-sectional	Whole Blood	Illumina		South Africa / Malawi	High	Unknown	Adolescent	Negative / Positive	165	NA	NA	54	NA	NA	NA	111	NA	NA	NA	NA	NA	NA	NA	Diagnosis of childhood tuberculosis and host RNA expression in Africa	2014	https://www.ncbi.nlm.nih.gov/pmc/articles/PMC4069985/
GSE40553	Cross-sectional / Longitudinal	Whole Blood	Illumina		the United Kingdom / South Africa	Low / High	> 17	Unknown	Negative	204	NA	NA	NA	38	NA	NA	37	129	NA	NA	NA	NA	NA	NA	Detectable changes in the blood transcriptome are present after two weeks of antituberculosis therapy	2012	https://doi.org/10.1371/journal.pone.0046191
GSE41055	Cross-sectional	Whole Blood	Affymetrix		Venezuela	High	1 - 14	Adolescent	Negative	27	9	NA	NA	9	NA	NA	9	NA	NA	NA	NA	NA	NA	NA	A predictive signature gene set for discriminating active from latent tuberculosis in Warao Amerindian children	2013	https://doi.org/10.1186/1471-2164-14-74
GSE42825	Cross-sectional	Whole Blood	Illumina		the United Kingdom	Low	18 - 87	Unknown	Negative	31	23	NA	NA	NA	NA	NA	8	NA	NA	NA	NA	NA	NA	NA	Transcriptional blood signatures distinguish pulmonary tuberculosis, pulmonary sarcoidosis, pneumonias and lung cancers	2013	https://www.ncbi.nlm.nih.gov/pmc/articles/PMC3734176/
GSE42826	Cross-sectional	Whole Blood	Illumina		the United Kingdom	Low	18 - 87	Unknown	Negative	63	52	NA	NA	NA	NA	NA	11	NA	NA	NA	NA	NA	NA	NA	Transcriptional blood signatures distinguish pulmonary tuberculosis, pulmonary sarcoidosis, pneumonias and lung cancers	2013	https://www.ncbi.nlm.nih.gov/pmc/articles/PMC3734176/
GSE42830	Cross-sectional	Whole Blood	Illumina		the United Kingdom	Low	18 - 87	Unknown	Negative	54	38	NA	NA	NA	NA	NA	16	NA	NA	NA	NA	NA	NA	NA	Transcriptional blood signatures distinguish pulmonary tuberculosis, pulmonary sarcoidosis, pneumonias and lung cancers	2013	https://www.ncbi.nlm.nih.gov/pmc/articles/PMC3734176/
GSE54992	Cross-sectional / Longitudinal	PBMC	Affymetrix		China	High	18 - 57	Adult	Unknown	39	6	NA	6	NA	NA	NA	9	18	NA	NA	NA	NA	NA	NA	Increased Complement C1q Level Marks Active Disease in Human Tuberculosis	2014	https://doi.org/10.1371/journal.pone.0092340
GSE56153	Cross-sectional / Longitudinal	Whole Blood	Illumina		Indonesia	High	> 15	Unknown	Negative	71	18	NA	NA	NA	NA	NA	18	35	NA	NA	NA	NA	NA	NA	Genome-Wide Expression Profiling Identifies Type 1 Interferon Response Pathways in Active Tuberculosis	2012	https://doi.org/10.1371/journal.pone.0045839
GSE6112	Cross-sectional	PBMC	Agilent		Germany	Low	Unknown	Unknown	Unknown	35	NA	NA	16	NA	NA	NA	19	NA	NA	NA	NA	NA	NA	NA	Candidate biomarkers for discrimination between infection and disease caused by Mycobactrium tuberculosis	2007	https://doi.org/10.1007/s00109-007-0157-6
GSE62147	Longitudinal	Whole Blood	Agilent		The Gambia	High	15 - 79	Unknown	Negative	28	NA	NA	NA	NA	NA	NA	14	14	NA	NA	NA	NA	NA	NA	Differential transcriptomic and metabolic profiles of M. africanum- and M. tuberculosis-infected patients after, but not before, drug treatment	2015	https://www.ncbi.nlm.nih.gov/pmc/articles/PMC4515549/
GSE62525	Cross-sectional	PBMC	Agilent		China	High	Unknown	Unknown	Unknown	42	14	NA	14	NA	NA	NA	14	NA	NA	NA	NA	NA	NA	NA	Gene expression profiling identifies candidate biomarkers for active and latent tuberculosis	2016	https://doi.org/10.1186/s12859-015-0848-x.
GSE67589	Longitudinal	Whole Blood	Affymetrix		South Africa	High	19 - 63	Adult	Negative	57	NA	NA	NA	NA	NA	NA	19	38	NA	NA	NA	NA	NA	NA	Excessive Cytolytic Responses Predict Tuberculosis Relapse After Apparently Successful Treatment	2016	https://academic.oup.com/jid/article/213/3/485/2459423?login=true
GSE69581	Cross-sectional	Whole Blood	Illumina		South Africa	High	Unknown	Adult	Positive	50	NA	NA	25	NA	NA	10	15	NA	NA	NA	NA	NA	NA	NA	Complement pathway gene activation and rising circulating immune complexes characterize early disease in HIV-associated tuberculosis	2018	https://doi.org/10.1073/pnas.1711853115
GSE73408	Cross-sectional	Whole Blood	Affymetrix		the United States	Low	20 - 86	Adult / Senior	Negative	70	NA	NA	35	NA	NA	NA	35	NA	NA	NA	NA	NA	NA	NA	Blood Transcriptional Biomarkers for Active Tuberculosis among Patients in the United States: a Case-Control Study with Systematic Cross-Classifier Evaluation	2016	https://doi.org/10.1128/jcm.01990-15
GSE79362	Cross-sectional / Longitudinal	Whole Blood		Illumina HiSeq 2000	South Africa	High	12 - 18	Adolescent	Negative	355	NA	245	90	NA	NA	NA	20	NA	10	15	25	9	3	3	A blood RNA signature for tuberculosis disease risk: a prospective cohort study	2016	https://www.ncbi.nlm.nih.gov/pmc/articles/PMC5392204/
GSE83456	Cross-sectional	Whole Blood	Illumina		the United Kingdom	Low	18 - 82	Adolescent / Adult / Senior	Negative	153	61	NA	NA	NA	NA	NA	92	NA	NA	NA	NA	NA	NA	NA	The transcriptional signature of active tuberculosis reflects symptom status in extra-pulmonary and pulmonary tuberculosis	2016	https://doi.org/10.1371/journal.pone.0162220
GSE84076	Cross-sectional	Whole Blood		Illumina HiSeq 2500	Brazil	High	>= 18	Unknown	Unknown	34	12	NA	NA	16	NA	NA	6	NA	NA	NA	NA	NA	NA	NA	Transcriptomic Biomarkers for Tuberculosis: Evaluation of DOCK9, EPHA4, and NPC2 mRNA Expression in Peripheral Blood	2016	https://doi.org/10.3389/fmicb.2016.01586
GSE89403	Cross-sectional	Whole Blood		Illumina HiSeq 2000	South Africa	High	Unknown	Adult	Negative	814	78	NA	NA	NA	NA	NA	182	554	NA	NA	NA	NA	NA	NA	Host blood RNA signatures predict the outcome of tuberculosis treatment	2017	https://www.ncbi.nlm.nih.gov/pmc/articles/PMC5658513/
GSE94438	Longitudinal	Whole Blood		Illumina HiSeq 2000	South Africa / The Gambia / Ethiopia	High	8 - 60	Adolescent / Adult	Negative	428	NA	327	NA	NA	NA	NA	NA	NA	12	21	19	43	6	NA	Four-Gene Pan-African Blood Signature Predicts Progression to Tuberculosis	2018	https://www.ncbi.nlm.nih.gov/pmc/articles/PMC6019933/
GSE100166	Cross-sectional	Whole Blood	Illumina		Unknown	Unknown	Unknown	Unknown	Unknown	34	11	NA	NA	NA	NA	NA	23	NA	NA	NA	NA	NA	NA	NA	Development of a fixed module repertoire for the analysis and interpretation of blood transcriptome data	2023	https://www.ncbi.nlm.nih.gov/pmc/articles/PMC8289976/
GSE101705	Cross-sectional	Whole Blood		Illumina NextSeq 500	India	High	>= 18 or < 16	Adult	Negative	44	NA	NA	NA	16	NA	NA	28	NA	NA	NA	NA	NA	NA	NA	Malnutrition leads to increased inflammation and expression of tuberculosis risk signatures in recently exposed household contacts of pulmonary tuberculosis	2022	https://doi.org/10.3389/fimmu.2022.1011166
GSE107991	Cross-sectional	Whole Blood		Illumina HiSeq 4000	the United Kingdom	Low	18 - 78	Adolescent / Adult / Senior	Negative	54	12	NA	21	NA	NA	NA	21	NA	NA	NA	NA	NA	NA	NA	A modular transcriptional signature identifies phenotypic heterogeneity of human tuberculosis infection	2018	https://doi.org/10.1038/s41467-018-04579-w
GSE107992	Cross-sectional	Whole Blood		Illumina HiSeq 4000	South Africa	High	18 - 48	Adolescent / Adult	Negative	47	NA	NA	31	NA	NA	NA	16	NA	NA	NA	NA	NA	NA	NA	A modular transcriptional signature identifies phenotypic heterogeneity of human tuberculosis infection	2018	https://doi.org/10.1038/s41467-018-04579-w
GSE107993	Cross-sectional	Whole Blood		Illumina HiSeq 4000	the United Kingdom	Low	17 - 65	Adolescent / Adult	Negative	138	NA	69	NA	69	NA	NA	NA	NA	NA	NA	NA	NA	NA	NA	A modular transcriptional signature identifies phenotypic heterogeneity of human tuberculosis infection	2018	https://doi.org/10.1038/s41467-018-04579-w
GSE107994	Cross-sectional	Whole Blood		Illumina HiSeq 4000	the United Kingdom	Low	16 - 84	Adolescent / Adult / Senior	Negative	175	NA	50	NA	49	2	12	62	NA	NA	NA	NA	3	3	17	A modular transcriptional signature identifies phenotypic heterogeneity of human tuberculosis infection	2018	https://doi.org/10.1038/s41467-018-04579-w
GSE112104	Cross-sectional / Longitudinal	PBMC		Illumina HiSeq 2500	Brazil	High	1 - 72	Infant / Adolescent / Adult / Senior	Negative	51	NA	NA	16	21	NA	NA	14	NA	NA	NA	NA	NA	NA	NA	Cross-validation of existing signatures and derivation of a novel 29-gene transcriptomic signature predictive of progression to TB in a Brazilian cohort of household contacts of pulmonary TB	2020	https://doi.org/10.1016/j.tube.2020.101898. Epub 2020 Jan 7.
GSE116014	Cross-sectional	Whole Blood	Illumina		South Africa	High	Unknown	Adolescent	Negative	82	NA	24	NA	58	NA	NA	NA	NA	NA	NA	NA	NA	NA	NA	A multi-cohort study of the immune factors associated with M. tuberculosis infection outcomes	2018	https://www.nature.com/articles/s41586-018-0439-x
GSE144127	Cross-sectional	Whole Blood	Illumina		the United Kingdom	Low	16 - 87	Adolescent / Adult / Senior	Negative / Positive	314	NA	NA	13	NA	NA	NA	301	NA	NA	NA	NA	NA	NA	NA	Transcriptomic signatures for diagnosing tuberculosis in clinical practice: a prospective, multicentre cohort study	2021	https://www.ncbi.nlm.nih.gov/pmc/articles/PMC7907671/
GSE152218	Cross-sectional	Whole Blood		Illumina HiSeq 2500	India	High	12 - 68	Adolescent / Adult / Senior	Negative	48	NA	NA	NA	32	NA	NA	16	NA	NA	NA	NA	NA	NA	NA	Malnutrition leads to increased inflammation and expression of tuberculosis risk signatures in recently exposed household contacts of pulmonary tuberculosis	2022	https://doi.org/10.3389/fimmu.2022.1011166
GSE157657	Cross-sectional / Longitudinal	Whole Blood		Illumina HiSeq 4000	the United Kingdom	Low	16 - 82	Adolescent / Adult / Senior	Negative	757	38	NA	NA	NA	10	10	67	582	2	NA	4	4	7	33	Blood transcriptomics reveal the evolution and resolution of the immune response in tuberculosis	2021	https://doi.org/10.1084/jem.20210915
GSE158208	Longitudinal	Whole Blood		Illumina HiSeq 4000	South Africa	High	>= 18	Unknown	Positive	12	NA	NA	NA	NA	NA	NA	6	6	NA	NA	NA	NA	NA	NA	Antiretroviral Treatment-Induced Decrease in Immune Activation Contributes to Reduced Susceptibility to Tuberculosis in HIV-1/Mtb Co-infected Persons	2021	https://doi.org/10.3389/fimmu.2021.645446
GSE193777	Cross-sectional	Whole Blood		Illumina HiSeq 4000	India	High	2 - 68	Adolescent / Adult / Senior	Negative	144	NA	NA	1	74	10	48	11	NA	NA	NA	NA	NA	NA	NA	Host blood-based biosignatures for subclinical TB and incipient TB: A prospective study of adult TB household contacts in Southern India	2023	https://doi.org/10.3389/fimmu.2022.1051963
Total										5902	426	969	597	516	22	80	1625	1507	25	36	53	61	19	54
NA = Not applicable
PBMC = Peripheral blood mononuclear cells
