# Supplementary material for: Peripheral blood cellular dynamics during the progression of human tuberculosis
Source: Research Square preprint supplement (doi:10.21203/rs.3.rs-5576143/v1), 2024-12-12
Supplement: Supplementary file 7 [file 6ed7520d323a3bf2d1544ae0.xlsx]

## Sheet: Supplementary Table S15
Supplementary Table S15. Results of cross-sectional multi-cohort meta-analyses of TB disease stages using only HIV-negative samples across global cohorts.
Cell type	Disease stage	Effect Size	StandardError(Effect Size)	FDR	Number of studies
Monocytes	LTBI vs UI	0.328535	0.0863998	5.53861e-07	11
Monocytes	LTBI NP vs UI	0.162183	0.0784353	0.310784	5
Monocytes	ITB vs UI	0.771239	0.364782	0.105317	1
Monocytes	STB vs UI	1.12093	0.251281	7.43658e-05	2
Monocytes	ATB vs UI	1.43647	0.151439	2.83997e-87	16
Neutrophils	LTBI vs UI	-0.109589	0.0737276	0.0779078	11
Neutrophils	LTBI NP vs UI	-0.133143	0.0783652	0.532573	5
Neutrophils	ITB vs UI	-0.345925	0.357315	0.425851	1
Neutrophils	STB vs UI	0.333472	0.239548	0.761329	2
Neutrophils	ATB vs UI	0.410326	0.090258	3.01757e-10	16
CD4+ T cells	LTBI vs UI	-0.029065	0.0779069	0.295364	11
CD4+ T cells	LTBI NP vs UI	0.0321351	0.121801	0.532573	5
CD4+ T cells	ITB vs UI	0.619054	0.361476	0.180297	1
CD4+ T cells	STB vs UI	-0.0956538	0.28401	0.552117	2
CD4+ T cells	ATB vs UI	-0.795878	0.140441	4.27113e-34	16
CD8+ T cells	LTBI vs UI	0.0216821	0.0900016	0.490012	11
CD8+ T cells	LTBI NP vs UI	0.053618	0.0782887	0.676945	5
CD8+ T cells	ITB vs UI	-0.578352	0.36071	0.340775	1
CD8+ T cells	STB vs UI	-0.368199	0.240377	0.21641	2
CD8+ T cells	ATB vs UI	-0.573205	0.111364	1.25555e-22	16
NK cells	LTBI vs UI	-0.14284	0.117255	0.00531225	11
NK cells	LTBI NP vs UI	-0.0902774	0.13179	0.532573	5
NK cells	ITB vs UI	-1.24854	0.379481	0.0054939	1
NK cells	STB vs UI	-0.605005	0.242472	0.0562382	2
NK cells	ATB vs UI	-0.740276	0.108098	6.33846e-28	16
B cells	LTBI vs UI	-0.0306813	0.0901492	0.258052	11
B cells	LTBI NP vs UI	0.038158	0.123571	0.662545	5
B cells	ITB vs UI	-0.0678774	0.355483	0.786407	1
B cells	STB vs UI	-0.839066	0.245987	0.00524608	2
B cells	ATB vs UI	-0.490228	0.115327	2.58582e-18	16
