# Supplementary material for: Peripheral blood cellular dynamics during the progression of human tuberculosis
Source: Research Square preprint supplement (doi:10.21203/rs.3.rs-5576143/v1), 2024-12-12
Supplement: Supplementary file 8 [file 803d69a0d36f7ac917d8f501.xlsx]

## Sheet: Supplementary Table S14A
Supplementary Table S14. Results of cross-sectional multi-cohort meta-analyses of TB disease stages stratified by age group: (A) adolescents, (B) adults, and (C) seniors.
Cell type	Disease stage	Effect Size	StandardError(Effect Size)	FDR	Number of studies
Monocytes	LTBI vs UI	0.250685	0.148336	0.176873	3
Monocytes	LTBI NP vs UI	0.0104516	0.215938	0.658793	2
Monocytes	ITB vs UI	NA	NA	NA	NA
Monocytes	STB vs UI	NA	NA	NA	NA
Monocytes	ATB vs UI	0.591627	0.215408	0.0445165	2
Neutrophils	LTBI vs UI	0.189361	0.113017	0.498835	3
Neutrophils	LTBI NP vs UI	0.108692	0.216235	0.671285	2
Neutrophils	ITB vs UI	NA	NA	NA	NA
Neutrophils	STB vs UI	NA	NA	NA	NA
Neutrophils	ATB vs UI	-0.00716047	0.415607	0.558544	2
CD4+ T cells	LTBI vs UI	-0.0652176	0.15628	0.369988	3
CD4+ T cells	LTBI NP vs UI	0.00798381	0.33632	0.57631	2
CD4+ T cells	ITB vs UI	NA	NA	NA	NA
CD4+ T cells	STB vs UI	NA	NA	NA	NA
CD4+ T cells	ATB vs UI	0.0883896	0.213234	0.728018	2
CD8+ T cells	LTBI vs UI	-0.16403	0.112946	0.369988	3
CD8+ T cells	LTBI NP vs UI	-0.234184	0.216555	0.437687	2
CD8+ T cells	ITB vs UI	NA	NA	NA	NA
CD8+ T cells	STB vs UI	NA	NA	NA	NA
CD8+ T cells	ATB vs UI	-0.517083	0.936658	0.116682	2
NK cells	LTBI vs UI	-0.225366	0.113056	0.369988	3
NK cells	LTBI NP vs UI	-0.162864	0.216127	0.519675	2
NK cells	ITB vs UI	NA	NA	NA	NA
NK cells	STB vs UI	NA	NA	NA	NA
NK cells	ATB vs UI	-0.22114	0.407349	0.512927	2
B cells	LTBI vs UI	-0.294079	0.181821	0.0481918	3
B cells	LTBI NP vs UI	-0.0646787	0.469771	0.437687	2
B cells	ITB vs UI	NA	NA	NA	NA
B cells	STB vs UI	NA	NA	NA	NA
B cells	ATB vs UI	-0.501914	0.214376	0.116682	2

## Sheet: Supplementary Table S14B
Supplementary Table S14. Results of cross-sectional multi-cohort meta-analyses of TB disease stages stratified by age group: (A) adolescents, (B) adults, and (C) seniors.
Cell type	Disease stage	Effect Size	StandardError(Effect Size)	FDR	Number of studies
Monocytes	LTBI vs UI	0.375647	0.107526	1.56604e-05	11
Monocytes	LTBI NP vs UI	0.186779	0.0957561	0.12078	4
Monocytes	ITB vs UI	0.319395	0.416708	0.642665	1
Monocytes	STB vs UI	1.15222	0.312509	6.12053e-05	2
Monocytes	ATB vs UI	1.70282	0.15991	3.62865e-90	15
Neutrophils	LTBI vs UI	-0.18947	0.0717065	0.0550802	10
Neutrophils	LTBI NP vs UI	-0.176545	0.0856763	0.476878	4
Neutrophils	ITB vs UI	-0.276337	0.416292	0.560523	1
Neutrophils	STB vs UI	0.322377	0.247385	0.588806	2
Neutrophils	ATB vs UI	0.443261	0.0798721	2.59367e-09	14
CD4+ T cells	LTBI vs UI	-0.0445619	0.0749458	0.478939	10
CD4+ T cells	LTBI NP vs UI	-0.0274141	0.0933622	0.794464	4
CD4+ T cells	ITB vs UI	0.698139	0.4229	0.204179	1
CD4+ T cells	STB vs UI	-0.124313	0.336451	0.458052	2
CD4+ T cells	ATB vs UI	-0.85909	0.141987	1.71431e-32	15
CD8+ T cells	LTBI vs UI	0.0350229	0.0880196	0.698079	11
CD8+ T cells	LTBI NP vs UI	0.0453111	0.085483	0.794464	4
CD8+ T cells	ITB vs UI	-0.2659	0.4162	0.560523	1
CD8+ T cells	STB vs UI	-0.398555	0.261341	0.174894	2
CD8+ T cells	ATB vs UI	-0.623232	0.101463	2.35681e-21	15
NK cells	LTBI vs UI	-0.118668	0.149192	0.0144291	11
NK cells	LTBI NP vs UI	-0.0361083	0.149741	0.671223	4
NK cells	ITB vs UI	-1.26876	0.44044	0.0222419	1
NK cells	STB vs UI	-0.542168	0.249726	0.097452	2
NK cells	ATB vs UI	-0.836254	0.113661	7.48602e-29	15
B cells	LTBI vs UI	0.150544	0.106125	0.034789	11
B cells	LTBI NP vs UI	0.124446	0.100696	0.203077	4
B cells	ITB vs UI	-0.0259561	0.415064	0.881658	1
B cells	STB vs UI	-0.913201	0.2558	0.00348971	2
B cells	ATB vs UI	-0.519358	0.122068	1.52634e-16	15

## Sheet: Supplementary Table S14C
Supplementary Table S14. Results of cross-sectional multi-cohort meta-analyses of TB disease stages stratified by age group: (A) adolescents, (B) adults, and (C) seniors.
Cell type	Disease stage	Effect Size	StandardError(Effect Size)	FDR	Number of studies
Monocytes	LTBI vs UI	0.0843863	0.548016	0.711714	1
Monocytes	LTBI NP vs UI	0.0843863	0.548016	0.711714	1
Monocytes	ITB vs UI	NA	NA	NA	NA
Monocytes	STB vs UI	NA	NA	NA	NA
Monocytes	ATB vs UI	NA	NA	NA	NA
Neutrophils	LTBI vs UI	-0.0904884	0.54806	0.711714	1
Neutrophils	LTBI NP vs UI	-0.0904884	0.54806	0.711714	1
Neutrophils	ITB vs UI	NA	NA	NA	NA
Neutrophils	STB vs UI	NA	NA	NA	NA
Neutrophils	ATB vs UI	NA	NA	NA	NA
CD4+ T cells	LTBI vs UI	-0.66066	0.565449	0.888812	1
CD4+ T cells	LTBI NP vs UI	-0.66066	0.565449	0.888812	1
CD4+ T cells	ITB vs UI	NA	NA	NA	NA
CD4+ T cells	STB vs UI	NA	NA	NA	NA
CD4+ T cells	ATB vs UI	NA	NA	NA	NA
CD8+ T cells	LTBI vs UI	1.05449	0.591836	0.369526	1
CD8+ T cells	LTBI NP vs UI	1.05449	0.591836	0.369526	1
CD8+ T cells	ITB vs UI	NA	NA	NA	NA
CD8+ T cells	STB vs UI	NA	NA	NA	NA
CD8+ T cells	ATB vs UI	NA	NA	NA	NA
NK cells	LTBI vs UI	-0.10353	0.548165	0.711714	1
NK cells	LTBI NP vs UI	-0.10353	0.548165	0.711714	1
NK cells	ITB vs UI	NA	NA	NA	NA
NK cells	STB vs UI	NA	NA	NA	NA
NK cells	ATB vs UI	NA	NA	NA	NA
B cells	LTBI vs UI	0.00130682	0.547723	0.711714	1
B cells	LTBI NP vs UI	0.00130682	0.547723	0.711714	1
B cells	ITB vs UI	NA	NA	NA	NA
B cells	STB vs UI	NA	NA	NA	NA
B cells	ATB vs UI	NA	NA	NA	NA
