# Supplementary material for: Peripheral blood cellular dynamics during the progression of human tuberculosis
Source: Research Square preprint supplement (doi:10.21203/rs.3.rs-5576143/v1), 2024-12-12
Supplement: Supplementary file 9 [file 815171ef46a1eaacc93ed29d.xlsx]

## Sheet: Supplementary Table S3A
Supplementary Table S3. Summary of publicly available cross-sectional cohorts used in the multi-cohort comparisons between (A) UI and LTBI, (B) UI and ATB, and (C) LTBI and ATB.
Dataset	Tissue	Coutntry	Samples	Uninfected (UI)	Latent Tuberculosis Infection (LTBI)	TB burden	Age group	HIV status
E-MTAB-6845	Whole Blood	the United Kingdom	351	217	134	Low	Adult / Senior	Negative
GSE19439	Whole Blood	the United Kingdom	29	12	17	Low	Adult	Negative
GSE19444	Whole Blood	the United Kingdom	33	12	21	Low	Adult	Negative
GSE28623	Whole Blood	The Gambia	62	37	25	High	Adult	Negative
GSE41055	Whole Blood	Venezuela	18	9	9	High	Adolescent	Negative
GSE54992	PBMC	China	12	6	6	High	Adult	Unknown
GSE62525	PBMC	China	28	14	14	High	Unknown	Unknown
GSE79362	Whole Blood	South Africa	335	245	90	High	Adolescent / Adult	Negative
GSE84076	Whole Blood	Brazil	28	12	16	High	Adult	Unknown
GSE107991	Whole Blood	the United Kingdom	33	12	21	Low	Adult	Negative
GSE107993	Whole Blood	the United Kingdom	138	69	69	Low	Adult	Negative
GSE107994	Whole Blood	the United Kingdom	113	50	63	Low	Adult	Negative
GSE116014	Whole Blood	South Africa	82	24	58	High	Adolescent	Negative
GSE157657	Whole Blood	the United Kingdom	58	38	20	Low	Adult	Negative
Total			1320	757	563

## Sheet: Supplementary Table S3B
Supplementary Table S3. Summary of publicly available cross-sectional cohorts used in the multi-cohort comparisons between (A) UI and LTBI, (B) UI and ATB, and (C) LTBI and ATB.
Dataset	Tissue	Country	Samples	Uninfected (UI)	Active Tuberculosis (ATB)	TB burden	Age group	HIV status
GSE19435	Whole Blood	the United Kingdom	19	12	7	Low	Adult	Negative
GSE19439	Whole Blood	the United Kingdom	25	12	13	Low	Adult	Negative
GSE19444	Whole Blood	the United Kingdom	33	12	21	Low	Adult	Negative
GSE28623	Whole Blood	The Gambia	83	37	46	High	Adult	Negative
GSE34608	Whole Blood	Germany	26	18	8	Low	Adult	Negative
GSE41055	Whole Blood	Venezuela	18	9	9	High	Adolescent	Negative
GSE42825	Whole Blood	the United Kingdom	31	23	8	Low	Adult	Negative
GSE42826	Whole Blood	the United Kingdom	63	52	11	Low	Adult	Negative
GSE42830	Whole Blood	the United Kingdom	54	38	16	Low	Adult	Negative
GSE54992	PBMC	China	15	6	9	High	Adult	Unknown
GSE56153	Whole Blood	Indonesia	36	18	18	High	Unknown	Negative
GSE62525	PBMC	China	28	14	14	High	Unknown	Unknown
GSE79362	Whole Blood	South Africa	265	245	20	High	Adolescent	Negative
GSE83456	Whole Blood	the United Kingdom	153	61	92	Low	Adult	Negative
GSE84076	Whole Blood	Brazil	18	12	6	High	Adult	Unknown
GSE89403	Whole Blood	South Africa	260	78	182	High	Adult	Negative
GSE100166	Whole Blood	Unknown	34	11	23	Unknown	Unknown	Unknown
GSE107991	Whole Blood	the United Kingdom	33	12	21	Low	Adult	Negative
GSE107994	Whole Blood	the United Kingdom	112	50	62	Low	Adult	Negative
GSE157657	Whole Blood	the United Kingdom	105	38	67	Low	Adult	Negative
Total			1411	758	653

## Sheet: Supplementary Table S3C
Supplementary Table S3. Summary of publicly available cross-sectional cohorts used in the multi-cohort comparisons between (A) UI and LTBI, (B) UI and ATB, and (C) LTBI and ATB.
Dataset	Tissue	Country	Samples	Latent Tuberculosis Infection (LTBI)	Active Tuberculosis (ATB)	TB burden	Age group	HIV status
GSE19439	Whole Blood	the United Kingdom	30	17	13	Low	Adult	Negative
GSE19442	Whole Blood	South Africa	51	31	20	High	Adult	Negative
GSE19444	Whole Blood	the United Kingdom	42	21	21	Low	Adult	Negative
GSE28623	Whole Blood	The Gambia	71	25	46	High	Adult	Negative
GSE37250	Whole Blood	South Africa / Malawi	362	167	195	High	Adult	Negative / Positive
GSE39939	Whole Blood	Kenya	93	14	79	High	Adolescent	Negative
GSE39940	Whole Blood	South Africa / Malawi	165	54	111	High	Adolescent	Negative
GSE40553	Whole Blood	South Africa	75	38	37	High	Adult	Negative
GSE41055	Whole Blood	Venezuela	18	9	9	High	Adolescent	Negative
GSE54992	PBMC	China	15	6	9	High	Adult	Unknown
GSE6112	PBMC	Germany	35	16	19	Low	Unknown	Unknown
GSE62525	PBMC	China	28	14	14	High	Unknown	Unknown
GSE69581	Whole Blood	South Africa	50	35	15	High	Adult	Positive
GSE73408	Whole Blood	the United States	70	35	35	Low	Adult	Negative
GSE79362	Whole Blood	South Africa	110	90	20	High	Adolescent	Negative
GSE84076	Whole Blood	Brazil	22	16	6	High	Adult	Unknown
GSE101705	Whole Blood	India	44	16	28	High	Adult	Negative
GSE107991	Whole Blood	the United Kingdom	42	21	21	Low	Adult	Negative
GSE107992	Whole Blood	South Africa	47	31	16	High	Adult	Negative
GSE107994	Whole Blood	the United Kingdom	125	63	62	Low	Adult	Negative
GSE112104	PBMC	Brazil	51	37	14	High	Adult	Negative
GSE144127	Whole Blood	the United Kingdom	314	13	301	Low	Adult	Negative
GSE152218	Whole Blood	India	48	32	16	High	Adult	Negative
GSE157657	Whole Blood	the United Kingdom	87	20	67	Low	Adult	Negative
GSE193777	Whole Blood	India	144	133	11	High	Adult	Negative
Total			2139	954	1185
