# Supplementary material for: Peripheral blood cellular dynamics during the progression of human tuberculosis
Source: Research Square preprint supplement (doi:10.21203/rs.3.rs-5576143/v1), 2024-12-12
Supplement: Supplementary file 10 [file cf70c4e39256c99b597856f3.xlsx]

## Sheet: Supplementary Table S5A
Supplementary Table S5. Cross-sectional multi-cohort meta-analysis results for TB groups based on (A) the traditional binary model and (B) the revised model, which includes multiple asymptomatic states, considering the effects of TB burden, age, and HIV status.
Cell type	Groups	P-value	FDR
Monocytes	LTBI vs UI	3.25085e-07	4.2261e-06
Neutrophils	LTBI vs UI	-0.124901	-0.324742
CD4+ T cells	LTBI vs UI	-0.190528	-0.372364
CD8+ T cells	LTBI vs UI	-0.168372	-0.513726
NK cells	LTBI vs UI	-0.000265167	-0.00344717
B cells	LTBI vs UI	0.200504	0.372364
Monocytes	ATB vs UI	2.45658e-52	3.19355e-51
Neutrophils	ATB vs UI	0.000182646	0.000791467
CD4+ T cells	ATB vs UI	-6.30964e-18	-8.20253e-17
CD8+ T cells	ATB vs UI	-5.90942e-09	-1.92056e-08
NK cells	ATB vs UI	-4.58745e-13	-2.98184e-12
B cells	ATB vs UI	-2.58916e-12	-1.12197e-11

## Sheet: Supplementary Table S5B
Supplementary Table S5. Cross-sectional multi-cohort meta-analysis results for TB groups based on (A) the traditional binary model and (B) the revised model, which includes multiple asymptomatic states, considering the effects of TB burden, age, and HIV status.
Cell type	Groups	P-value	FDR
Monocytes	LTBI NP vs UI	0.0502535	0.326648
Neutrophils	LTBI NP vs UI	-0.0382542	-0.381286
CD4+ T cells	LTBI NP vs UI	0.305082	0.658548
CD8+ T cells	LTBI NP vs UI	0.267521	0.658548
NK cells	LTBI NP vs UI	-0.128583	-0.557194
B cells	LTBI NP vs UI	0.0908443	0.393659
Monocytes	ITB vs UI	0.0179545	0.116704
Neutrophils	ITB vs UI	-0.192169	-0.779409
CD4+ T cells	ITB vs UI	0.11552	0.378329
CD8+ T cells	ITB vs UI	-0.0378453	-0.245994
NK cells	ITB vs UI	-0.00133367	-0.0173377
B cells	ITB vs UI	-0.464904	-0.863393
Monocytes	STB vs UI	5.02084e-06	6.52709e-05
Neutrophils	STB vs UI	0.113939	0.718658
CD4+ T cells	STB vs UI	-0.294734	-0.547362
CD8+ T cells	STB vs UI	-0.0592936	-0.192704
NK cells	STB vs UI	-0.0106792	-0.0694149
B cells	STB vs UI	-0.000364772	-0.00474203
