# Supplementary material for: Peripheral blood cellular dynamics during the progression of human tuberculosis
Source: Research Square preprint supplement (doi:10.21203/rs.3.rs-5576143/v1), 2024-12-12
Supplement: Supplementary file 11 [file e0f9f10ec01da233116c6aec.xlsx]

## Sheet: Supplementary Table S13A
Supplementary Table S13. Results of cross-sectional multi-cohort meta-analyses of TB disease stages separated by TB burden: (A) low-burden and (B) high-burden regions.
Cell type	Disease stage	Effect Size	StandardError(Effect Size)	FDR	Number of studies
Monocytes	LTBI vs UI	0.299051	0.108361	0.001298	7
Monocytes	LTBI NP vs UI	0.174814	0.11325	0.0977899	3
Monocytes	ITB vs UI	0.771239	0.364782	0.105317	1
Monocytes	STB vs UI	1.12093	0.251281	7.43658e-05	2
Monocytes	ATB vs UI	1.75997	0.15888	9.84451e-69	11
Neutrophils	LTBI vs UI	-0.164332	0.0745861	0.173439	7
Neutrophils	LTBI NP vs UI	-0.169708	0.084081	0.213619	3
Neutrophils	ITB vs UI	-0.345925	0.357315	0.425851	1
Neutrophils	STB vs UI	0.333472	0.239548	0.761329	2
Neutrophils	ATB vs UI	0.489759	0.0845914	4.76523e-08	11
CD4+ T cells	LTBI vs UI	0.0197037	0.113446	0.563861	7
CD4+ T cells	LTBI NP vs UI	0.0302679	0.149268	0.527764	3
CD4+ T cells	ITB vs UI	0.619054	0.361476	0.180297	1
CD4+ T cells	STB vs UI	-0.0956538	0.28401	0.552117	2
CD4+ T cells	ATB vs UI	-1.04957	0.121429	7.48001e-29	11
CD8+ T cells	LTBI vs UI	0.0889551	0.129588	0.231817	7
CD8+ T cells	LTBI NP vs UI	0.0968875	0.0839678	0.527764	3
CD8+ T cells	ITB vs UI	-0.578352	0.36071	0.340775	1
CD8+ T cells	STB vs UI	-0.368199	0.240377	0.21641	2
CD8+ T cells	ATB vs UI	-0.559487	0.0925919	7.27755e-10	11
NK cells	LTBI vs UI	-0.120052	0.170029	0.0350573	7
NK cells	LTBI NP vs UI	-0.083859	0.183152	0.390726	3
NK cells	ITB vs UI	-1.24854	0.379481	0.0054939	1
NK cells	STB vs UI	-0.605005	0.242472	0.0562382	2
NK cells	ATB vs UI	-0.868827	0.110872	1.62575e-20	11
B cells	LTBI vs UI	0.038854	0.0913851	0.563861	7
B cells	LTBI NP vs UI	0.0918859	0.0952492	0.527764	3
B cells	ITB vs UI	-0.0678774	0.355483	0.786407	1
B cells	STB vs UI	-0.839066	0.245987	0.00524608	2
B cells	ATB vs UI	-0.484223	0.15635	1.99338e-10	11

## Sheet: Supplementary Table S13B
Supplementary Table S13. Results of cross-sectional multi-cohort meta-analyses of TB disease stages separated by TB burden: (A) low-burden and (B) high-burden regions.
Cell type	Disease stage	Effect Size	StandardError(Effect Size)	FDR	Number of studies
Monocytes	LTBI vs UI	0.397934	0.137885	6.28431e-05	7
Monocytes	LTBI NP vs UI	0.0529614	0.188081	0.750586	3
Monocytes	ITB vs UI	NA	NA	NA	NA
Monocytes	STB vs UI	NA	NA	NA	NA
Monocytes	ATB vs UI	1.20053	0.242888	2.41462e-31	8
Neutrophils	LTBI vs UI	-0.0692033	0.170055	0.24625	5
Neutrophils	LTBI NP vs UI	0.0450452	0.188241	0.741431	3
Neutrophils	ITB vs UI	NA	NA	NA	NA
Neutrophils	STB vs UI	NA	NA	NA	NA
Neutrophils	ATB vs UI	0.154263	0.19046	0.00368896	6
CD4+ T cells	LTBI vs UI	-0.127876	0.0930671	0.24625	6
CD4+ T cells	LTBI NP vs UI	-0.041954	0.226097	0.633297	3
CD4+ T cells	ITB vs UI	NA	NA	NA	NA
CD4+ T cells	STB vs UI	NA	NA	NA	NA
CD4+ T cells	ATB vs UI	-0.312401	0.213912	7.01944e-08	8
CD8+ T cells	LTBI vs UI	-0.125557	0.091976	0.24625	7
CD8+ T cells	LTBI NP vs UI	-0.139299	0.188455	0.633297	3
CD8+ T cells	ITB vs UI	NA	NA	NA	NA
CD8+ T cells	STB vs UI	NA	NA	NA	NA
CD8+ T cells	ATB vs UI	-0.583012	0.234686	3.55478e-14	8
NK cells	LTBI vs UI	-0.156454	0.113017	0.21571	7
NK cells	LTBI NP vs UI	-0.113739	0.188098	0.633297	3
NK cells	ITB vs UI	NA	NA	NA	NA
NK cells	STB vs UI	NA	NA	NA	NA
NK cells	ATB vs UI	-0.533544	0.217664	9.35288e-12	8
B cells	LTBI vs UI	0.0495627	0.215506	0.167464	7
B cells	LTBI NP vs UI	0.161495	0.395571	0.46923	3
B cells	ITB vs UI	NA	NA	NA	NA
B cells	STB vs UI	NA	NA	NA	NA
B cells	ATB vs UI	-0.572359	0.18209	9.35288e-12	8
