# Supplementary material for: Peripheral blood cellular dynamics during the progression of human tuberculosis
Source: Research Square preprint supplement (doi:10.21203/rs.3.rs-5576143/v1), 2024-12-12
Supplement: Supplementary file 12 [file e1bfd6efd3ab068da56eedf1.xlsx]

## Sheet: Supplementary Table S8
Supplementary Table S8. Summary of publicly available longitudinal cohorts used in multi-cohort meta-analyses of blood samples from ATB progressors categorized by days before TB diagnosis.
Dataset	Cohort Name	Country	Tissue	Samples	UI (Uninfected)	Days before TB diagnosis						TB burden	Age group	HIV status
						(-Inf, -540)	[-540, -360)	[-360, -180)	[-180, -60)	[-60, -21)	[-21, 0]
E-MTAB-6845	Roe_UK	the United Kingdom	Whole Blood	222	217	1*	NA	5	2*	NA	1*	Low	Adolescent / Adult / Senior	Negative
GSE79362	Zak_SA	South Africa	Whole Blood	304	245	10	15	25	9	3*	3*	High	Adolescent / Adult	Negative
GSE94438	Suliman_GC6-74	South Africa / The Gambia / Ethiopia	Whole Blood	428	327	12	21	19	43	6	NA	High	Adolescent/ Adult	Negative
GSE107994	Singhania_Leicester	the United Kingdom	Whole Blood	67	50	NA	NA	NA	3*	3*	17	Low	Adolescent / Adult / Senior	Negative
GSE157657	Tabone_Leicester	the United Kingdom	Whole Blood	78	38	2*	-	4*	4*	7	33	Low	Adolescent / Adult / Senior	Negative
Total				877	660	22	36	44	52	13	50
*Groups with less than 5 samples were not used in comparison.
