# Supplementary material for: Peripheral blood cellular dynamics during the progression of human tuberculosis
Source: Research Square preprint supplement (doi:10.21203/rs.3.rs-5576143/v1), 2024-12-12
Supplement: Supplementary file 13 [file f1307328a044e2176c4bb0f2.xlsx]

## Sheet: Supplementary Table S4A
Supplementary Table S4. Results from cross-sectional multi-cohort analyses comparing (A) UI and LTBI, (B) UI and ATB, and (C) LTBI and ATB across global cohorts.
Cell type	Effect Size	StandardError(Effect Size)	FDR	Number of studies
Monocytes	0.344527	0.0844462	8.12517e-08	14
Neutrophils	-0.104814	0.0682526	0.0692714	12
CD4+ T cells	-0.0491594	0.0690172	0.256571	13
CD8+ T cells	-0.00759963	0.0849524	0.354417	14
NK cells	-0.101399	0.105971	0.0104527	14
B cells	0.012425	0.10451	0.23286	14

## Sheet: Supplementary Table S4B
Supplementary Table S4. Results from cross-sectional multi-cohort analyses comparing (A) UI and LTBI, (B) UI and ATB, and (C) LTBI and ATB across global cohorts.
Cell type	Effect Size	StandardError(Effect Size)	FDR	Number of studies
Monocytes	1.50215	0.148136	1.58551e-98	20
Neutrophils	0.38627	0.0869845	9.65339e-10	18
CD4+ T cells	-0.762956	0.125603	2.85438e-35	20
CD8+ T cells	-0.516448	0.107716	3.66095e-22	20
NK cells	-0.750726	0.106971	2.74398e-31	20
B cells	-0.506656	0.110754	1.37376e-20	20

## Sheet: Supplementary Table S4C
Supplementary Table S4. Results from cross-sectional multi-cohort analyses comparing (A) UI and LTBI, (B) UI and ATB, and (C) LTBI and ATB across global cohorts.
Cell type	Effect Size	StandardError(Effect Size)	FDR	Number of studies
Monocytes	0.943362	0.11399	6.70349e-66	25
Neutrophils	0.721409	0.0989605	2.74617e-44	21
CD4+ T cells	-0.71841	0.118756	2.29097e-55	25
CD8+ T cells	-0.51565	0.102173	3.0606e-25	25
NK cells	-0.577811	0.104908	4.79034e-37	25
B cells	-0.621432	0.100497	2.65293e-29	25
